# Supplementary material for: Nucleotide-derived theranostic nanodots with intrinsic fluorescence and singlet oxygen generation for bioimaging and photodynamic therapy
Source: PubMed Central journal article supplement — Nanoscale Adv. 2019 Apr 22;1(6):2250–7. doi: 10.1039/c9na00058e (PMC9417059; doi:10.1039/c9na00058e), 2019-04-22
Supplement: NA-001-C9NA00058E-s001.pdf [file NA-001-C9NA00058E-s001.pdf]

## Supporting Information

### Nucleotide-derived Theranostic Nanodots with Intrinsic Fluorescence and Singlet Oxygen Generation for Bioimaging and Photodynamic Therapy

Xin Ting Zheng,<sup>a</sup> Yee Ching Lai,<sup>b</sup> Yen Nee Tan<sup>a,b,c\*</sup>

<sup>a</sup> Institute of Materials Research and Engineering (IMRE), Agency for Science, Technology and Research (A\*STAR), 2 Fusionopolis Way, Singapore 138634, Singapore

<sup>b</sup> Department of Chemistry, National University of Singapore, 3 Science Drive, Singapore 117543, Singapore

<sup>c</sup> Faculty of Science, Agriculture & Engineering, Newcastle University, Newcastle Upon Tyne NE1 7RU, United Kingdom

\*Corresponding author: <sup>a</sup> [tanyn@imre.a-star.edu.sg](mailto:tanyn@imre.a-star.edu.sg); <sup>c</sup> [yennee.tan@newcastle.ac.uk](mailto:yennee.tan@newcastle.ac.uk)

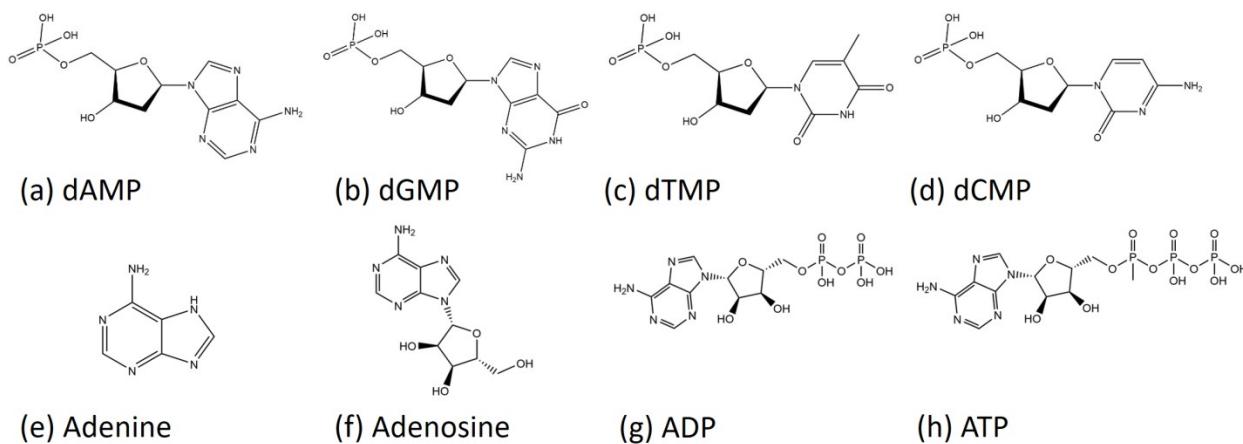

**Figure S1.** Molecular structure of the four nucleotides and adenine-containing nucleotides precursors (a) dAMP (b) dGMP (c) dCMP (d) dTMP (e) Adenine (f) Adenosine (g) ADP (h) ATP

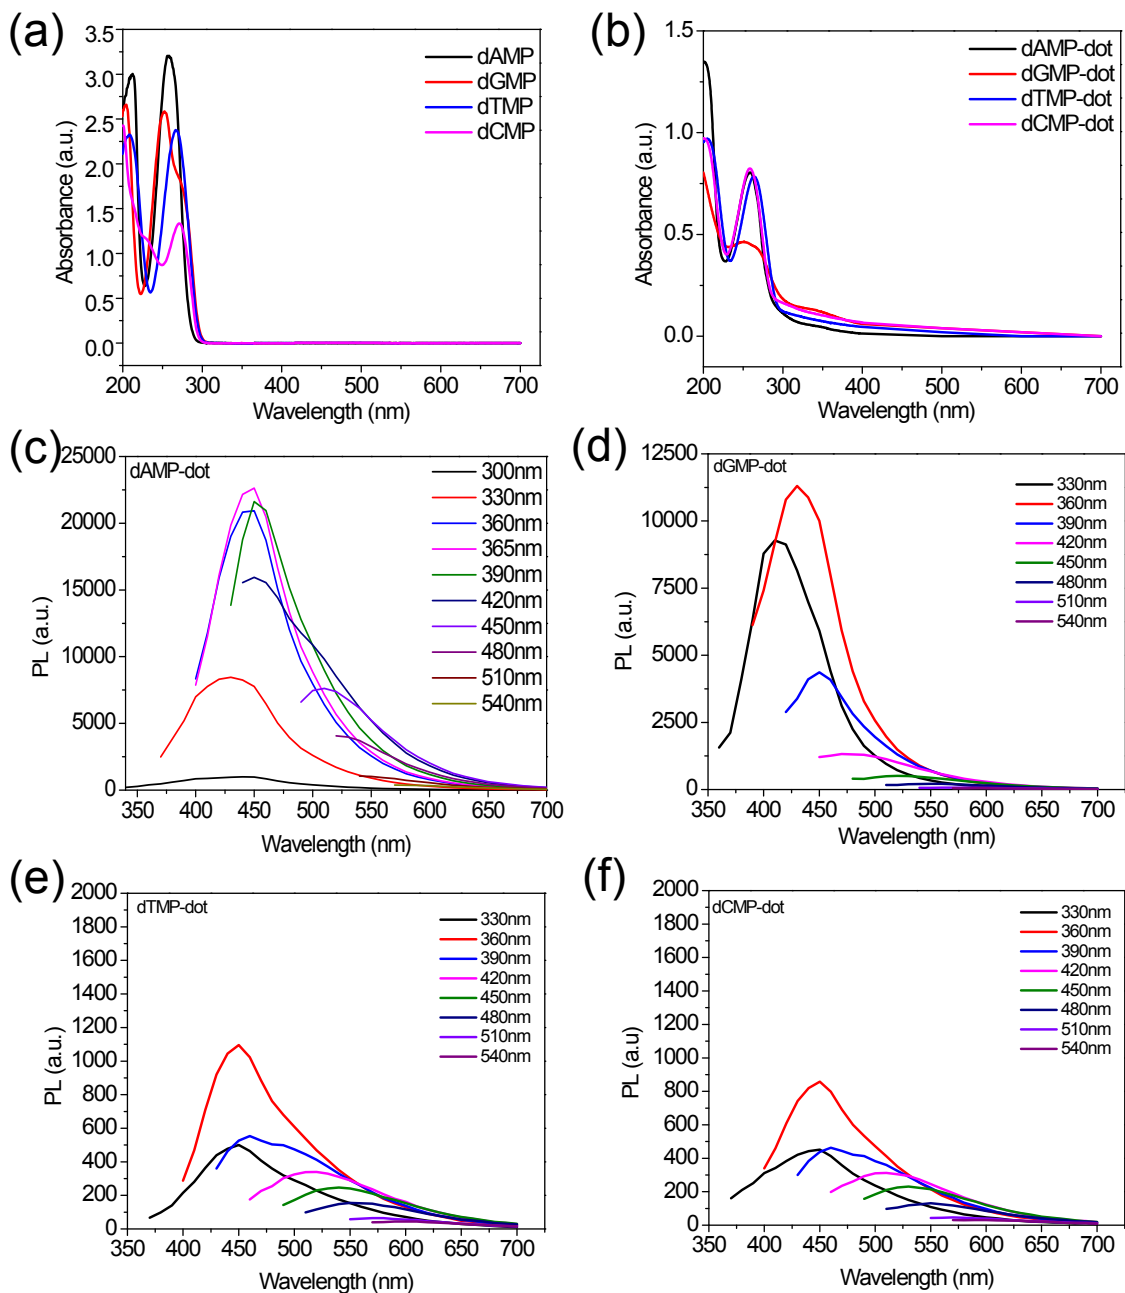

**Figure S2.** UV-Vis absorption spectra of (a) nucleotides precursors and (b) N-dots; Excitation-dependent photoluminescence spectra of (c) dAMP-dots versus (d) dGMP-dots, (e) dTMP-dots, and (f) dCMP-dots

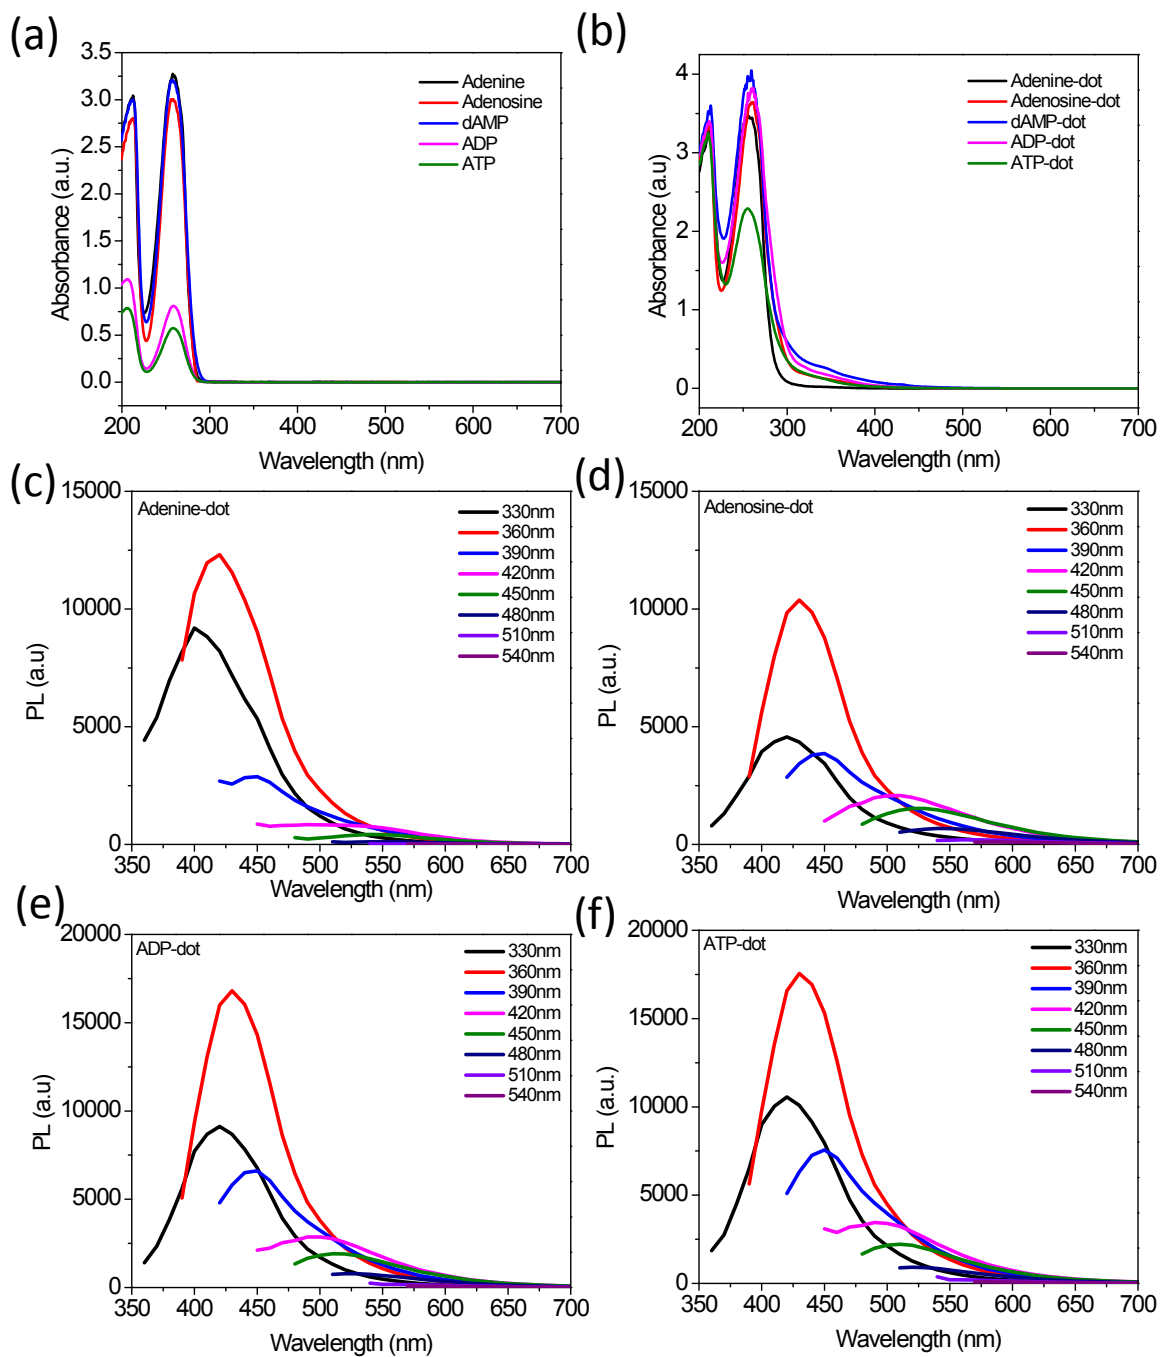

**Figure S3.** UV-Vis absorption spectra of (a) precursors and (b) A-dots. Excitation dependent photoluminescence Intensity of (c) Adenine, (d) Adenosine, (e) ADP and (f) ATP-dots

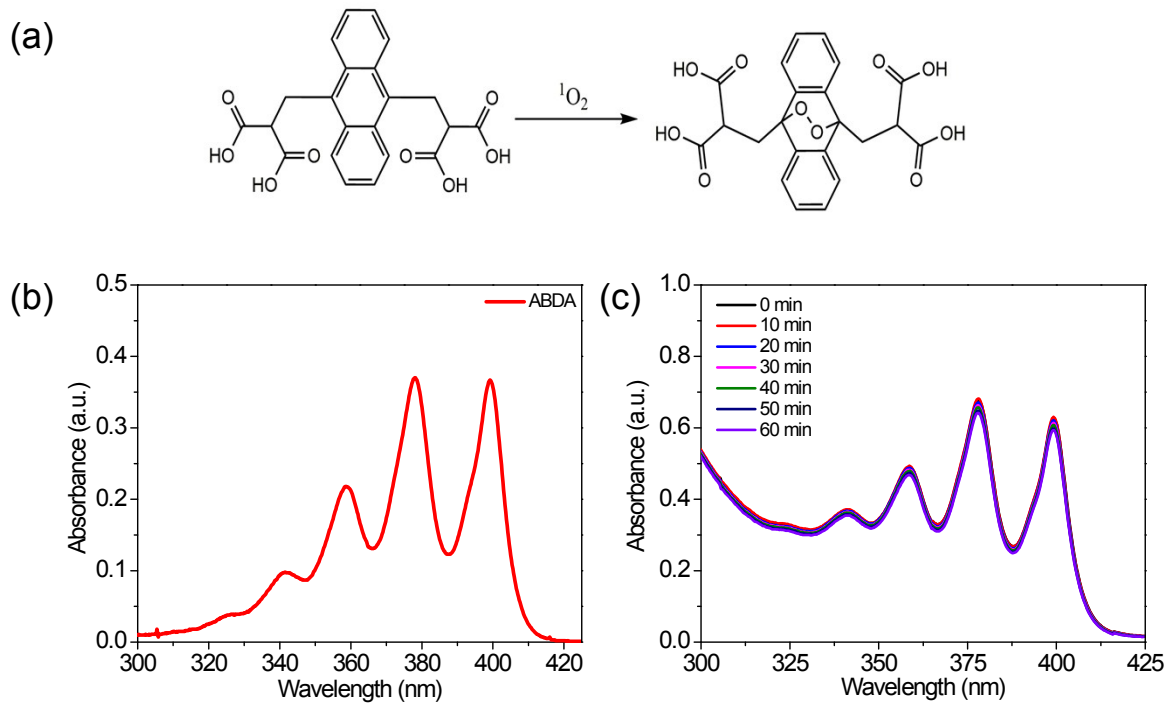

**Figure S4.** (a) Structure of ABDA and its product after the reaction with singlet oxygen. (b) UV-Vis absorption spectrum of ABDA solution. (c) Time course absorption profile of ABDA showing no generation of singlet oxygen the absence of dAMP-dots

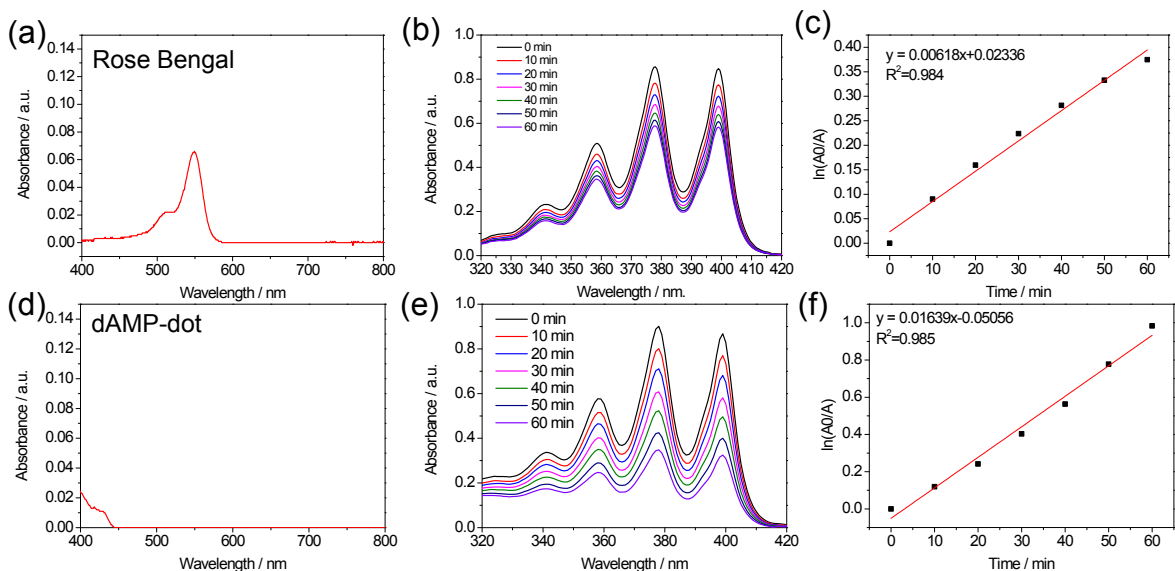

**Figure S5.** (a) UV-Vis absorption spectrum of Rose Bengal from 400 to 800 nm. (b) Time course absorption spectra of ABDA solution in the presence of Rose Bengal with light. (c) Decomposition rate constant of ABDA in the presence of Rose Bengal with light (d) UV-Vis Absorption spectrum of dAMP-dots from 400 to 800 nm. (e) Time course absorption spectra of ABDA solution in the presence of dAMP-dots with light. (f) Decomposition rate constant of ABDA in the presence of dAMP-dots with light

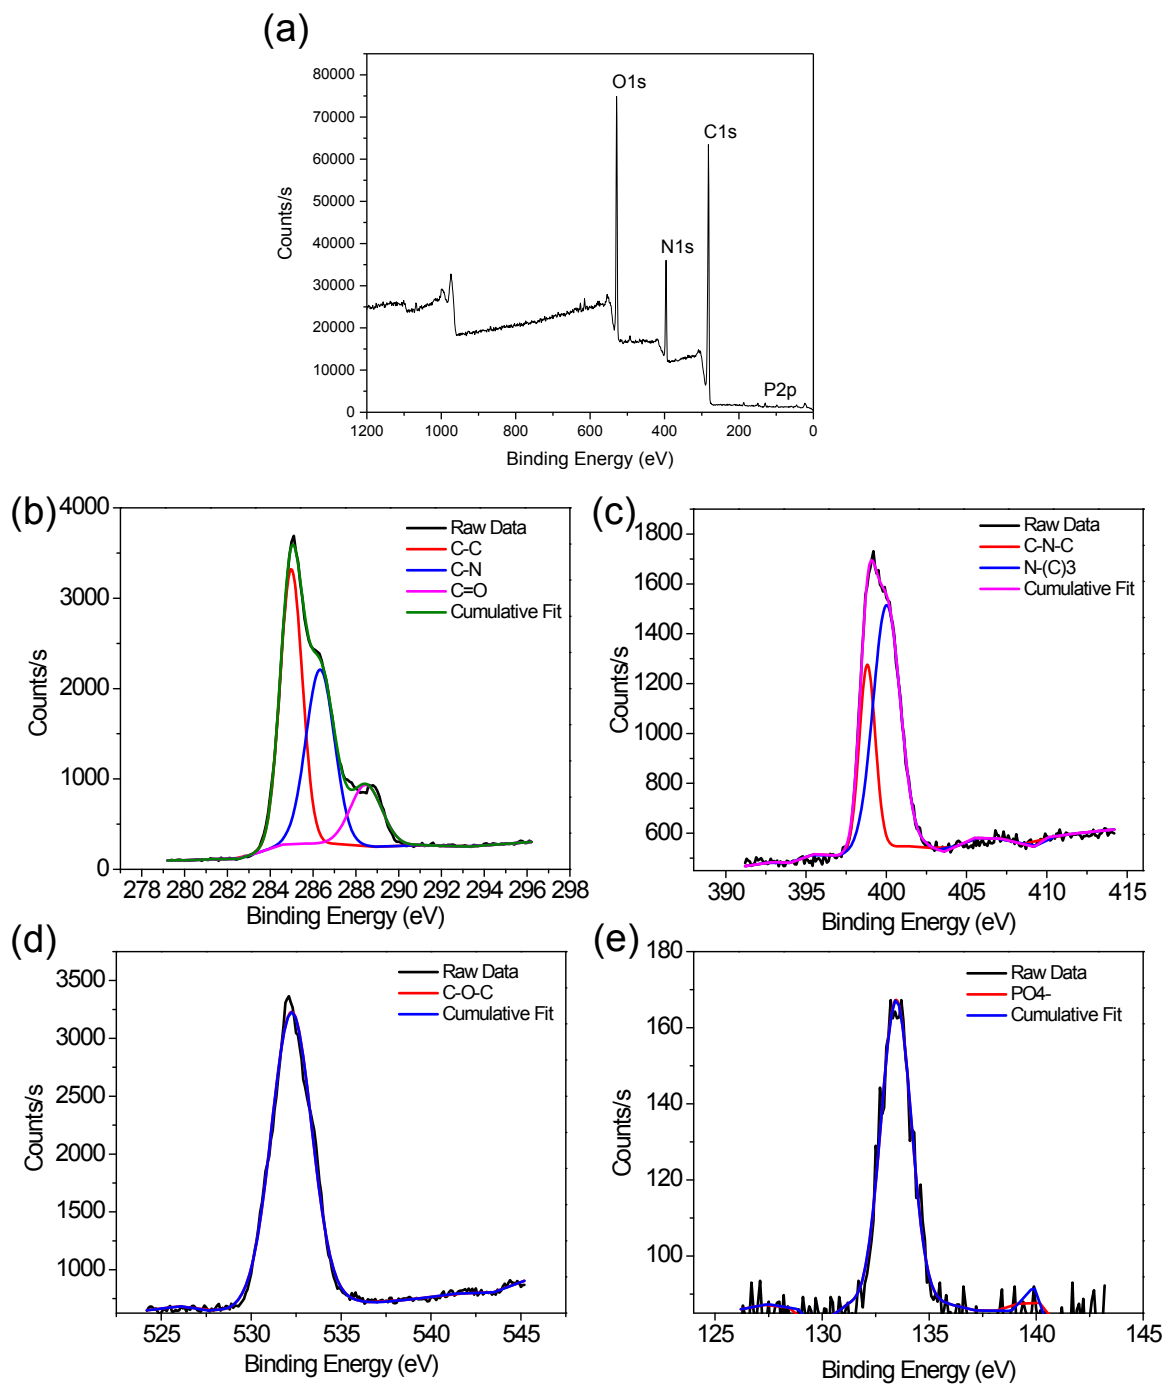

**Figure S6.** (a) XPS spectrum of dAMP-dots; (b-e) high resolution XPS spectra of (b) C1s, (c) N1s, (d) O1s and (e) P2p

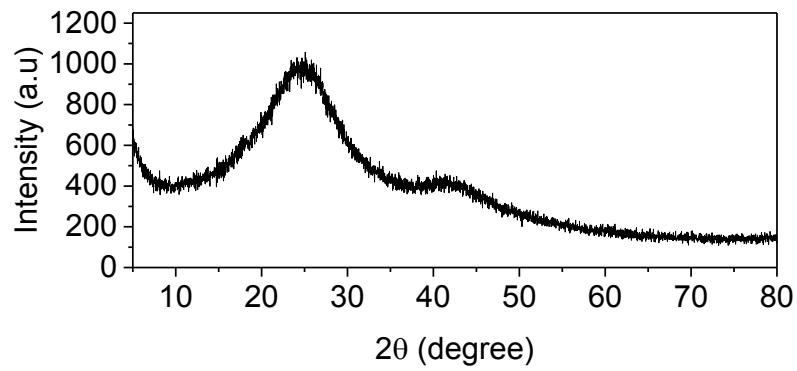

**Figure S7.** X-ray Diffraction pattern of dAMPdots

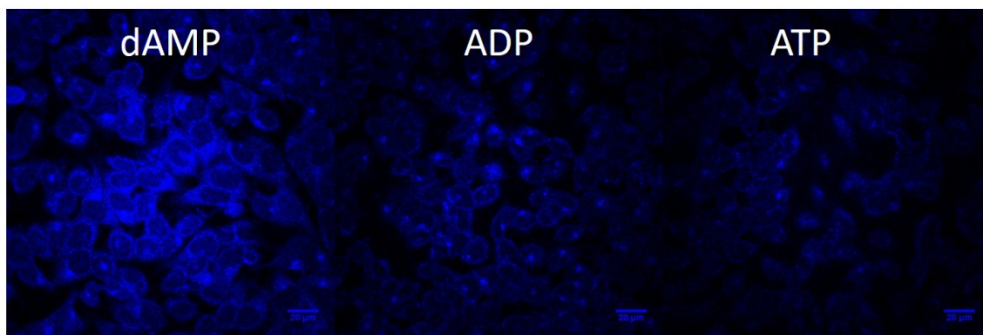

**Figure S8.** Confocal fluorescence images of dAMP, ADP and ATP-dot treated HeLa cells.

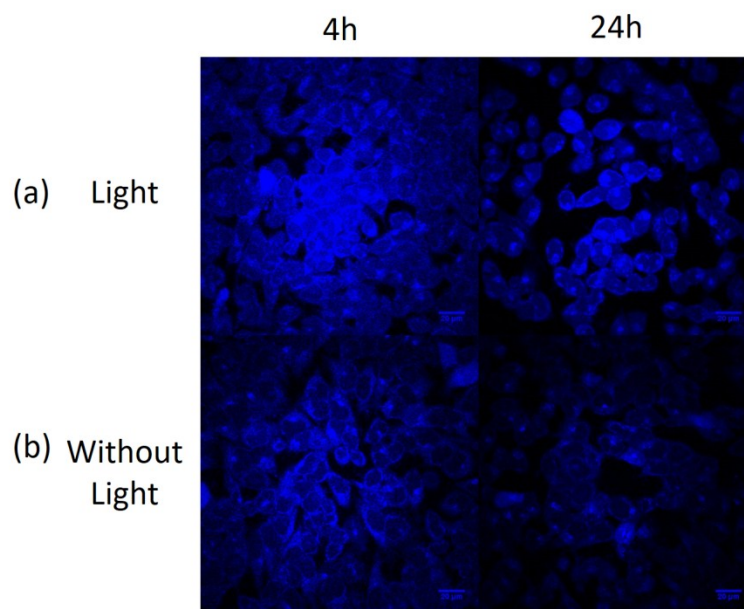

**Figure S9.** Fluorescence images of HeLa cells after 4 h (left column) and 12 h (right column) of incubation in the presence of dAMP-dots (a) with and (b) without light irradiation.



**Table S1.** Comparison of the intrinsic singlet oxygen generation quantum yield of this work to the reported carbon dot with intrinsic PDT function.

|   | <b>Carbon source</b>                                               | <b>Synthesis method</b> | <b>Applications</b>                           | <b>Fluorescence quantum yield (%)</b> | <b>Singlet oxygen (<math>^1\text{O}_2</math>) quantum yield</b> | <b>Reference</b> |
|---|--------------------------------------------------------------------|-------------------------|-----------------------------------------------|---------------------------------------|-----------------------------------------------------------------|------------------|
| 1 | <b>dAMP</b>                                                        | <b>Hydrothermal</b>     | <b>Photodynamic Therapy</b>                   | <b>12.4</b>                           | <b>1.2</b>                                                      | <b>This work</b> |
| 2 | Graphite rod                                                       | Electrochemical etching | Photodynamic Therapy of glioma                | Not reported                          | Not reported                                                    | <sup>1</sup>     |
| 3 | mono-hydroxylphenyl triphenylporphyrin (TPP) and chitosan          | Hydrothermal            | Photodynamic Therapy of Hepatoma              | Not reported                          | Not reported                                                    | <sup>2</sup>     |
| 4 | Coal                                                               | Solvothermal            | Nil                                           | 47                                    | 0.19                                                            | <sup>3</sup>     |
| 5 | Polythiophene benzoic acid (PBA)                                   | Hydrothermal            | In vivo Photodynamic and photothermal Therapy | 3.5                                   | 0.26                                                            | <sup>4</sup>     |
| 6 | 3,6-di(2-thienyl)-2,5-dihydropyrrolo(3,4-c)pyrrole-1,4-dione (DPP) | Hydrothermal            | Photodynamic Therapy                          | Not reported                          | 0.276                                                           | <sup>5</sup>     |
| 7 | As-synthesized polythiophene (PT2)                                 | Hydrothermal            | In vivo Photodynamic Therapy                  | Not reported                          | 1.3                                                             | <sup>6</sup>     |

**Table S2.** Comparison of the fluorescence quantum yield of dAMP dots in this work to the previously reported carbon dots derived from nucleic acid and other precursors

|                                                | <b>Carbon source</b>                 | <b>Synthesis method</b>          | <b>Applications</b>                                           | <b>Fluorescence quantum yield (%)</b> | <b>Reference</b> |
|------------------------------------------------|--------------------------------------|----------------------------------|---------------------------------------------------------------|---------------------------------------|------------------|
| Dots derived from nucleic acid precursors      |                                      |                                  |                                                               |                                       |                  |
| 1                                              | <b>dAMP</b>                          | <b>Hydrothermal</b>              | <b>Photodynamic Therapy</b>                                   | <b>12.4</b>                           | <b>This work</b> |
| 2                                              | Low molecular weight DNA from salmon | Hydrothermal                     | Cell imaging                                                  | 3.65                                  | 7                |
| 3                                              | DNA                                  | Heating                          | Fe <sup>3+</sup> sensing                                      | 7.5                                   | 8                |
| 4                                              | C <sub>29</sub>                      | Hydrothermal                     | Biothiols and glutathione reductase activity detection        | 1.1                                   | 9                |
| Examples of Dots derived from other precursors |                                      |                                  |                                                               |                                       |                  |
| 5                                              | D-glucose and L-aspartic acid        | Pyrolysis                        | In vivo fluorescence imaging for noninvasive glioma diagnosis | 7.5                                   | 10               |
| 6                                              | Carbon nanopowder                    | Reflux in nitric acid            | Two-photon excited photodynamic therapy                       | 13                                    | 11               |
| 7                                              | α-cyclodextrin                       | Dehydration using sulphuric acid | Bioimaging and Targeted Photodynamic Therapy                  | 2.1-10.9                              | 12               |
| 8                                              | Almond husk                          | High temperature carbonization   | Adsorptive removal of pollutant                               | 1.9                                   | 13               |
| 9                                              | Lemon peel                           | Hydrothermal                     | Detection of Cr <sup>6+</sup> in water purification           | 14                                    | 14               |
| 10                                             | Soot                                 | Hydrothermal                     | Intracellular trinitrotoluene detection                       | 12.7                                  | 15               |
| 11                                             | Carbon black                         | Reflux in nitric acid            | Bioimaging                                                    | 4.04                                  | 16               |
| 12                                             | Bithiophene                          | Ultrasonication                  | Bioimaging and bacteria killing                               | 10                                    | 17               |
| 13                                             | Amino acids                          | Hydrothermal                     | Bioimaging                                                    | 15-30.44                              | 18               |

## References

1. Z. M. Markovic, B. Z. Ristic, K. M. Arsin, D. G. Klisic, L. M. Harhaji-Trajkovic, B. M. Todorovic-Markovic, D. P. Kepic, T. K. Kravic-Stevovic, S. P. Jovanovic, M. M. Milenkovic, D. D. Milivojevic, V. Z. Bumbasirevic, M. D. Dramicanin and V. S. Trajkovic, *Biomaterials*, 2012, **33**, 7084-7092.
2. Y. Li, X. Zheng, X. Zhang, S. Liu, Q. Pei, M. Zheng and Z. Xie, *Advanced Healthcare Materials*, 2017, **6**, 1600924.
3. M. Li, C. Yu, C. Hu, W. Yang, C. Zhao, S. Wang, M. Zhang, J. Zhao, X. Wang and J. Qiu, *Chemical Engineering Journal*, 2017, **320**, 570-575.
4. J. Ge, Q. Jia, W. Liu, M. Lan, B. Zhou, L. Guo, H. Zhou, H. Zhang, Y. Wang, Y. Gu, X. Meng and P. Wang, *Advanced Healthcare Materials*, 2016, **5**, 665-675.
5. H. He, X. Zheng, S. Liu, M. Zheng, Z. Xie, Y. Wang, M. Yu and X. Shuai, *Nanoscale*, 2018, **10**, 10991-10998.
6. J. Ge, M. Lan, B. Zhou, W. Liu, L. Guo, H. Wang, Q. Jia, G. Niu, X. Huang, H. Zhou, X. Meng, P. Wang, C. S. Lee, W. Zhang and X. Han, *Nat Commun*, 2014, **5**, 4596.
7. C. X. Guo, J. Xie, B. Wang, X. Zheng, H. B. Yang and C. M. Li, *Sci Rep*, 2013, **3**, 2957.
8. G. Cheng, W. Zhang, Y. Zhou, Q. Ge and C. Huang, *Anal. Methods*, 2015, **7**, 6274-6279.
9. Q. H. Li, L. Zhang, J. M. Bai, Z. C. Liu, R. P. Liang and J. D. Qiu, *Biosens Bioelectron*, 2015, **74**, 886-894.
10. M. Zheng, S. Ruan, S. Liu, T. Sun, D. Qu, H. Zhao, Z. Xie, H. Gao, X. Jing and Z. Sun, *ACS Nano*, 2015, **9**, 11455-11461.
11. C. Fowley, N. Nomikou, A. P. McHale, B. McCaughan and J. F. Callan, *Chemical Communications*, 2013, **49**, 8934-8936.
12. Y. Choi, S. Kim, M.-H. Choi, S.-R. Ryoo, J. Park, D.-H. Min and B.-S. Kim, *Advanced Functional Materials*, 2014, **24**, 5781-5789.
13. K. M. Tripathi, A. Tyagi, M. Ashfaq and R. K. Gupta, *RSC Advances*, 2016, **6**, 29545-29553.
14. A. Tyagi, K. M. Tripathi, N. Singh, S. Choudhary and R. K. Gupta, *RSC Advances*, 2016, **6**, 72423-72432.
15. S. Devi, R. K. Gupta, A. K. Paul, V. Kumar, A. Sachdev, P. Gopinath and S. Tyagi, *RSC Advances*, 2018, **8**, 32684-32694.
16. Y. Dong, C. Chen, X. Zheng, L. Gao, Z. Cui, H. Yang, C. Guo, Y. Chi and C. M. Li, *Journal of Materials Chemistry*, 2012, **22**, 8764-8766.
17. K. P. Prasad, A. Than, N. Li, M. Alam Sk, H. Duan, K. Pu, X. Zheng and P. Chen, *Materials Chemistry Frontiers*, 2017, **1**, 152-157.
18. H. V. Xu, X. T. Zheng, Y. Zhao and Y. N. Tan, *ACS Applied Materials & Interfaces*, 2018, **10**, 19881-19888.
